# Supplementary material for: Establishment and stability of the latent HIV-1 DNA reservoir
Source: eLife journal article supplement (doi:10.7554/elife.18889), 2016-11-14
Supplement: supp [file elife-18889-supp-v1.zip]

Archive with 10 entries (10 files):
- elife_poa_e18889_Figure_2_figure_supplement_3.pdf
- elife_poa_e18889_Figure_3_figure_supplement_1.pdf
- elife_poa_e18889_Supplementary_File_1.csv
- elife_poa_e18889_Figure_2_figure_supplement_2.pdf
- elife_poa_e18889_Figure_3_figure_supplement_3.pdf
- elife_poa_e18889_Figure_4_figure_supplement_2.pdf
- elife_poa_e18889_Figure_3_figure_supplement_2.pdf
- elife_poa_e18889_Supplementary_File_2.csv
- elife_poa_e18889_Figure_2_figure_supplement_1.pdf
- elife_poa_e18889_Figure_4_figure_supplement_1.pdf
