# Supplementary material for: Establishment and stability of the latent HIV-1 DNA reservoir
Source: eLife journal article supplement (doi:10.7554/elife.18889), 2016-11-14
Supplement: supp [file elife-18889-supp-v1.zip › elife_poa_e18889_Supplementary_File_1.csv]

pcode	sample	#reads	#templates	#haplotypes>0.002	#haplotypes>0.01	fraction recaptured	fraction_hyper	avg_stop_good	avg_stop_hyper	frac_stop_good	frac_stop_hyper
p1	2012-10-02	19363	820	58	27	0.33	0.1329339462	0.0821966764	1.851981352	0.0148311394	0.8391608392
p1	2014-10-07	36454	148	23	13	0.31	0.1469523235	0.0973405795	0.8170617883	0.0136025983	0.3651297368
p1	2015-02-12	44434	38	36	22	0.41	0.1736958185	0.0768602244	1.4317180617	0.0089879072	0.8537185799
p2	2015-06-09	16586	75	26	12	NA	0.2960327987	0.0932682425	1.6556008147	0.0399109284	0.9910386965
p3	2012-09-18	23347	243	116	25	0.56	0.1965563027	0.0817784412	1.2342558292	0.0465401429	0.7507082153
p3	2014-10-13	28450	102	117	31	0.45	0.3075219684	0.1210090858	1.7853468968	0.0498451855	0.8213510115
p3	2015-04-24	44850	108	98	34	0.38	0.2488963211	0.1023837088	1.2109647944	0.0504348859	0.6155155424
p5	2012-10-26	11190	180	23	14	0.14	0.2170688114	0.0775025682	1.992589543	0.0091313777	0.9407163442
p5	2015-03-16	39762	72	56	29	0.07	0.0652381671	0.0886246233	1.3612181958	0.0387968145	0.9919043948
p6	2012-10-24	191468	115	17	11	0.09	0.1037562413	0.0905234205	0.9455854223	0.0102970828	0.6077217356
p6	2014-11-03	33887	15	9	3	0.33	0	0.0949626701	nan	0.010800602	nan
p7	2014-12-01	35565	28	71	43	0	0.132995923	0.0505918599	1.4317124736	0.0255553754	0.8824524313
p7	2015-04-17	38323	108	67	41	0.02	0.1126216632	0.0590760726	1.3487025023	0.0055282736	0.9467099166
p8	2012-09-21	6553	180	32	12	0.17	0.4217915459	0.0683557667	1.7510853835	0.0155713909	0.8744573082
p8	2014-11-18	75473	279	16	11	0	0.3080836856	0.069703759	2.0020213315	0.007621455	0.9993979013
p8	2015-04-07	18750	175	68	35	0.06	0.33856	0.0665215288	1.4439193447	0.036687631	0.8807498425
p9	2012-10-05	43306	60	64	43	0.19	0.1320371311	0.0590614026	0.5218607905	0.0115196339	0.4433368311
p9	2014-10-02	11620	72	27	16	0.5	0.0012048193	0.0384283991	0	0.0055143891	0
p9	2015-03-18	65003	72	71	39	0.15	0.1245480978	0.0606428032	1.8675889328	0.0077670585	0.9841897233
p10	2012-10-09	7513	249	32	16	0.25	0.0464528151	0.0254048018	2	0.0032104969	1
p10	2014-10-24	50537	116	74	29	0.28	0.1482082435	0.1668176644	1.2204272363	0.0719678491	0.9974632844
p10	2015-02-27	59041	51	55	29	0.41	0.0075032604	0.0614696747	0.5598194131	0.0068261715	0.2799097065
p11	2012-10-10	47701	124	36	23	0.3	0.1640846104	0.2053217636	1.0035773604	0.0600140442	0.8635492526
p11	2014-10-22	32126	120	29	17	0.53	0.2888314761	0.2106622314	2.083414161	0.0840372915	0.8416855265
p11	2015-02-25	6834	123	57	37	0.35	0.3394790752	0.1129818343	0.999137931	0.0372175454	0.7573275862
