# Supplementary material for: Establishment and stability of the latent HIV-1 DNA reservoir
Source: eLife journal article supplement (doi:10.7554/elife.18889), 2016-11-14
Supplement: supp [file elife-18889-supp-v1.zip › elife_poa_e18889_Supplementary_File_2.csv]

Patient/Plasmid	Primer name	Sequence
pAll	alla_fwb1c_689d_705e	ACG CAG GAC TCG GCT TGC
pAll	all_fw2(nex)f _770_787	(gTGC TCG GCA GCG TCA GAT GTG TAT AAG AGA CAG)h CGG AGG CTA GAA GGA GAG
p1-p5, p7, p8-p11	p1_p2_p3_p4_p5_p7_p8_p9_p10_p11_rev1_1339_1321	AAT CTT GTG GGG TGG CTC C
p6	p6_rev1_1339_1321	AAT CTG CTG GRG TGG CTC C
p1, p7, p8, p11	p1_p7_p8_p11_rev2(nex)_1101_1176	(GTC TCG TGG GCT CGG AGA TGT GTA TAA GAG ACA G)GT ATA GGG TAA TTT TGG CTG
p2	p2_rev2(nex)_1191-1176	(GTC TCG TGG GCT CGG AGA TGT GTA TAA GAG ACA G)GT ATG GGG TAA TTT TGG CTG
p3	p3_rev2(nex)_1191-1176	(GTC TCG TGG GCT CGG AGA TGT GTA TAA GAG ACA G)GT ATC GGG TAA TTT TGG CTG
p5	p5 _rev2(nex)_1191-1176	(GTC TCG TGG GCT CGG AGA TGT GTA TAA GAG ACA G)GT ATA GGG WAA TTT TGG CTG
p6	p6_rev2(nex)_1191-1173	(GTC TCG TGG GCT CGG AGA TGT GTA TAA GAG ACA G)GT ATA GGA TAA TTT TGG CTG
p9, p10	p9_p10_rev2(nex)_1191-1176	(GTC TCG TGG GCT CGG AGA TGT GTA TAA GAG ACA G)GT ATA GGG TAA TTT TGR CTG
NL4-3	NL4-3_fw1_689_705	ACG CAG GAC TCG GCT TGC
NL4-3	NL4-3_rev1_1339_1321	AAT CTT GTG GGG TGG CTC C
NL4-3	NL4-3_fw2(nex)_770_787	(TGC TCG GCA GCG TCA GAT GTG TAT AAG AGA CAG) CGG AGG CTA GAA GGA GAG
NL4-3	NL4-3_rev2(nex)_1191_1173	(GTC TCG TGG GCT CGG AGA TGT GTA TAA GAG ACA G) TAT AGG GTA ATT TTG GCT G
a Patient number.
b Primer direction.
c Primer position, 1= outer primer 2= inner primer.
d Start position of the primer according to HXB2 coordinates.
e Stop position of the primer according to HXB2 coordinates.
f Nextera adapter.
g Start position of the NexteraXT adapter.
h Stop position of the NexteraXT adapter.
