# Supplementary figures and images for: Establishment and stability of the latent HIV-1 DNA reservoir
Source: eLife journal article supplement (doi:10.7554/elife.18889), 2016-11-14

A

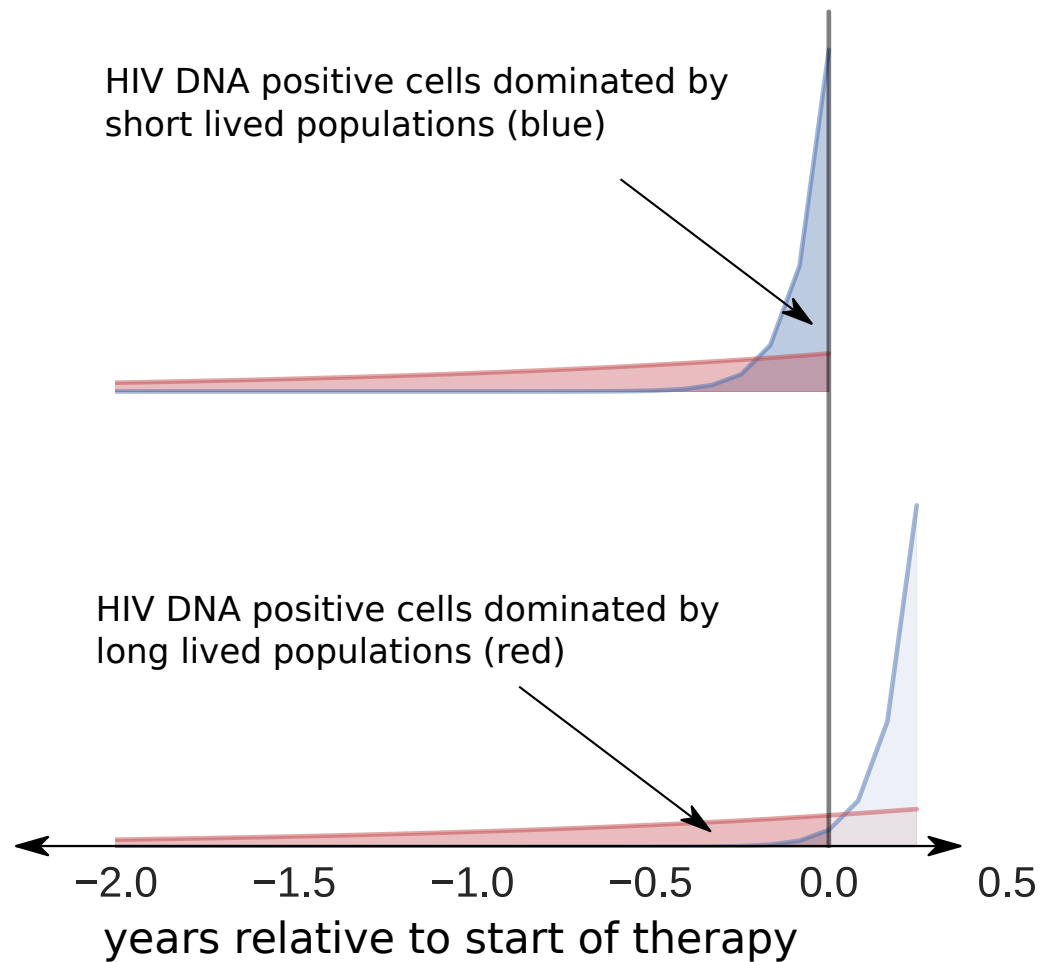

B

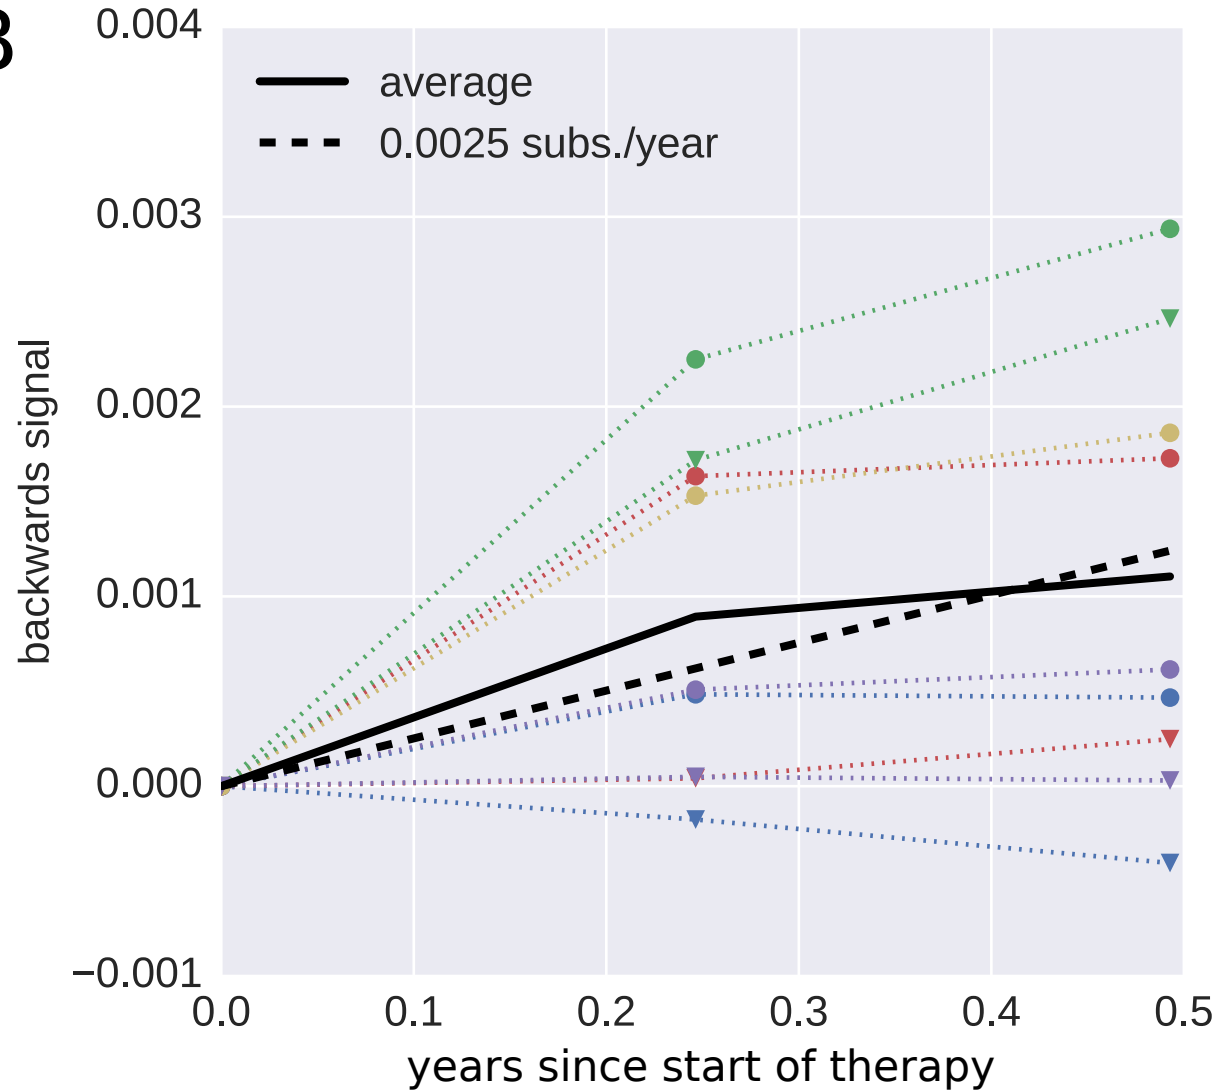

Supplement: supp [file elife-18889-supp-v1.zip]

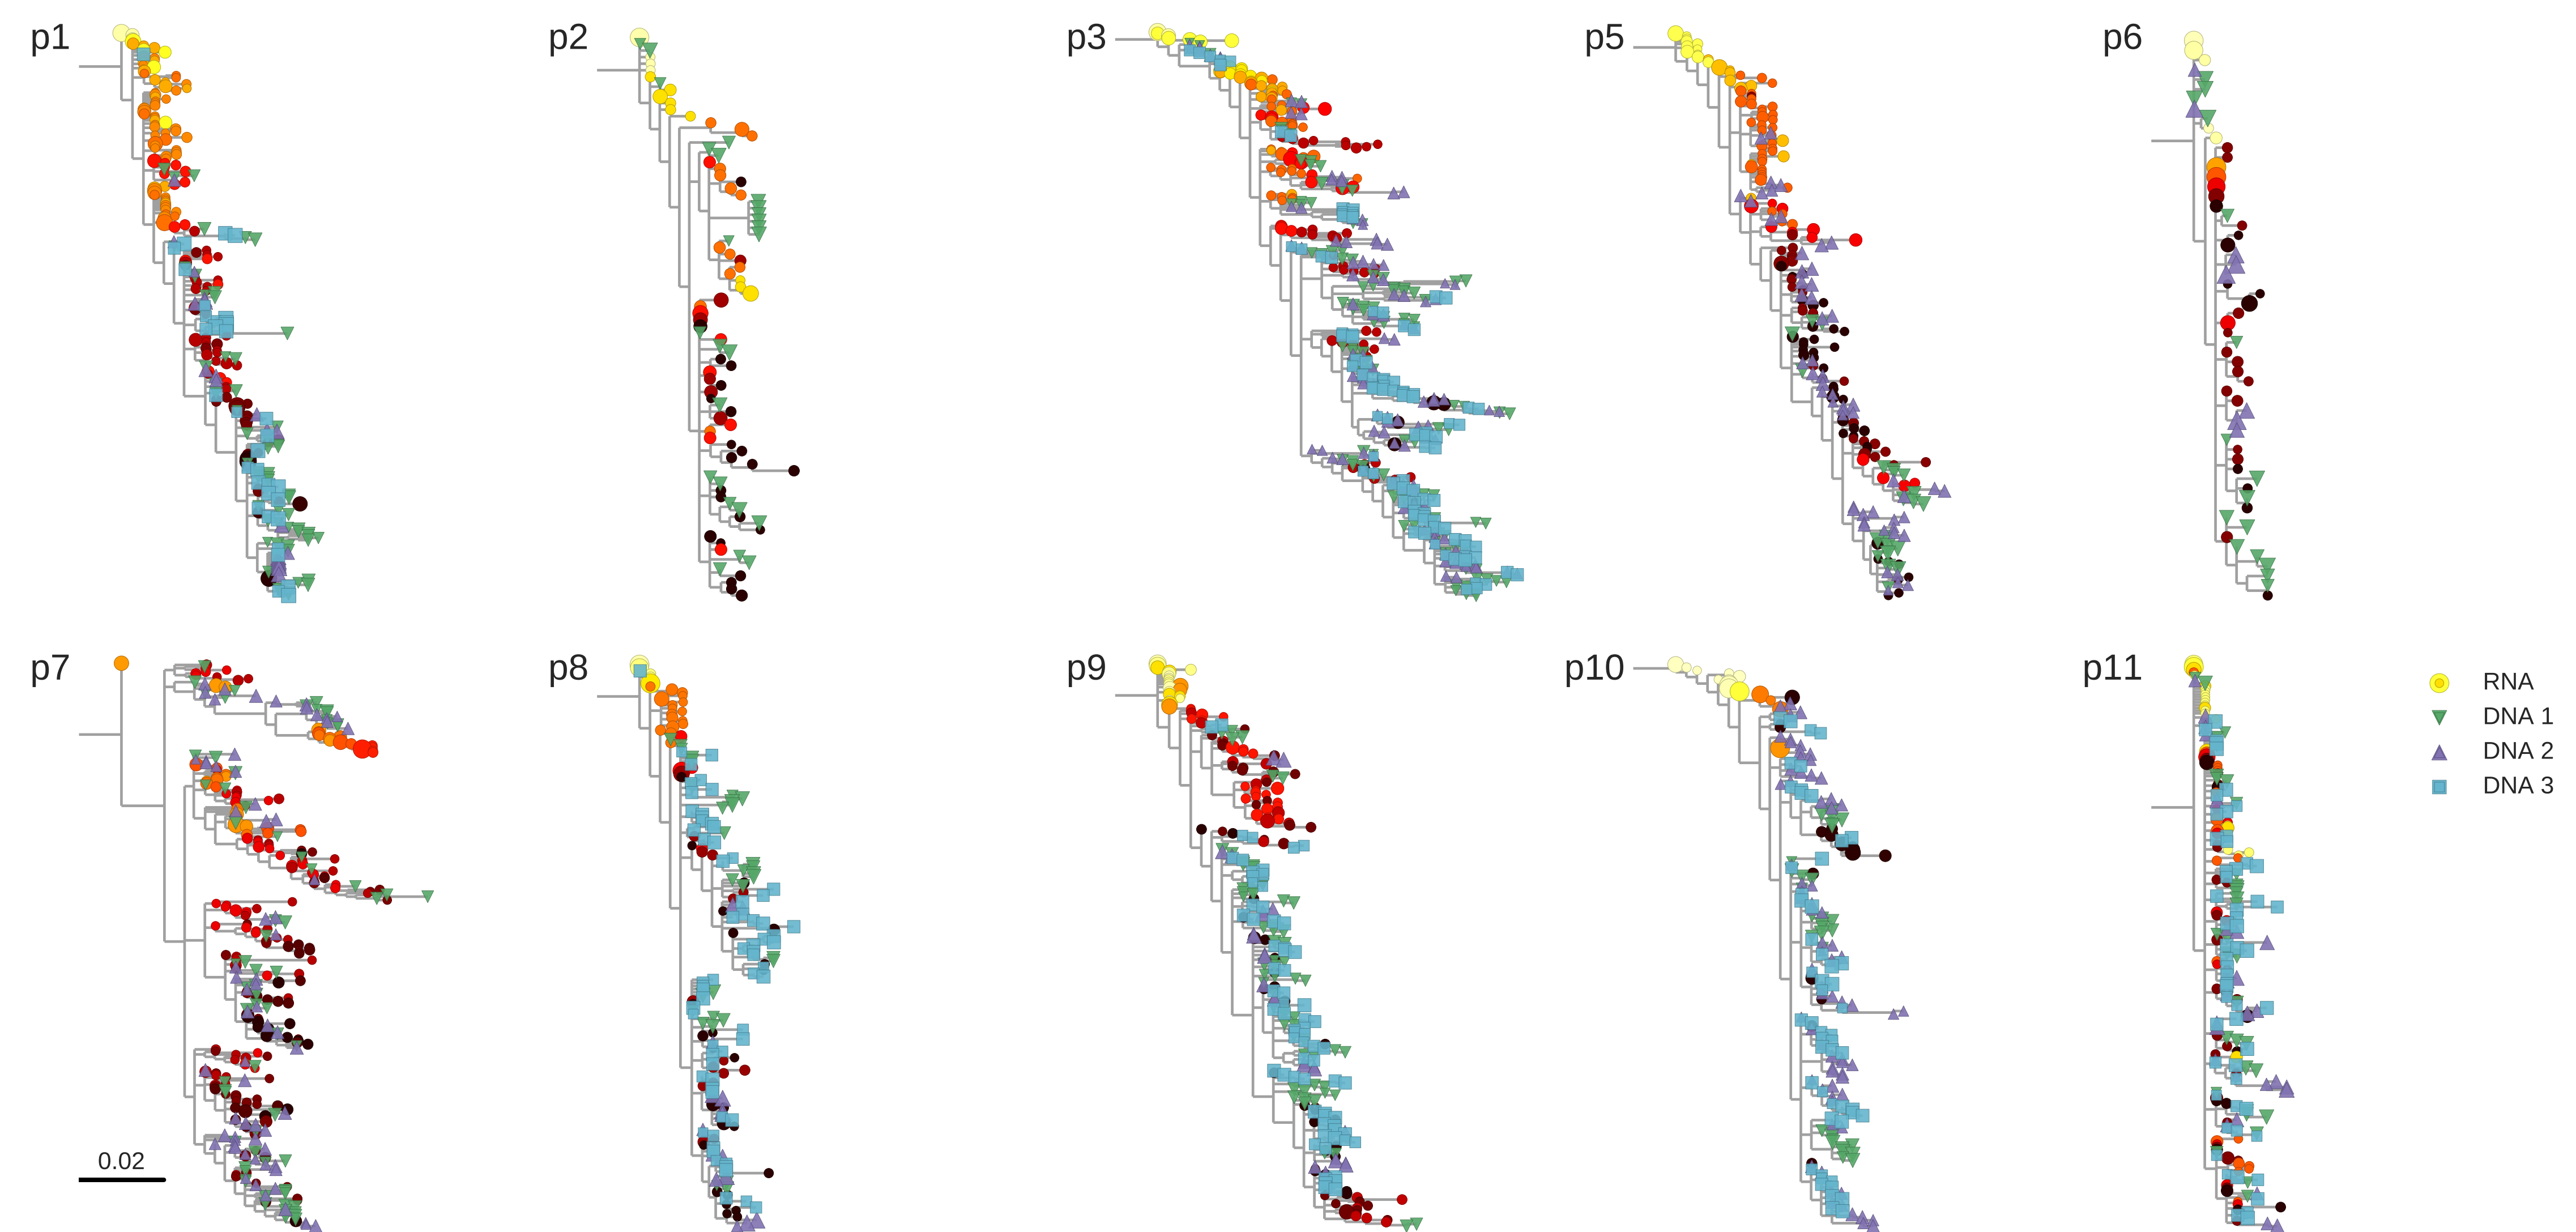

Supplement: supp [file elife-18889-supp-v1.zip]

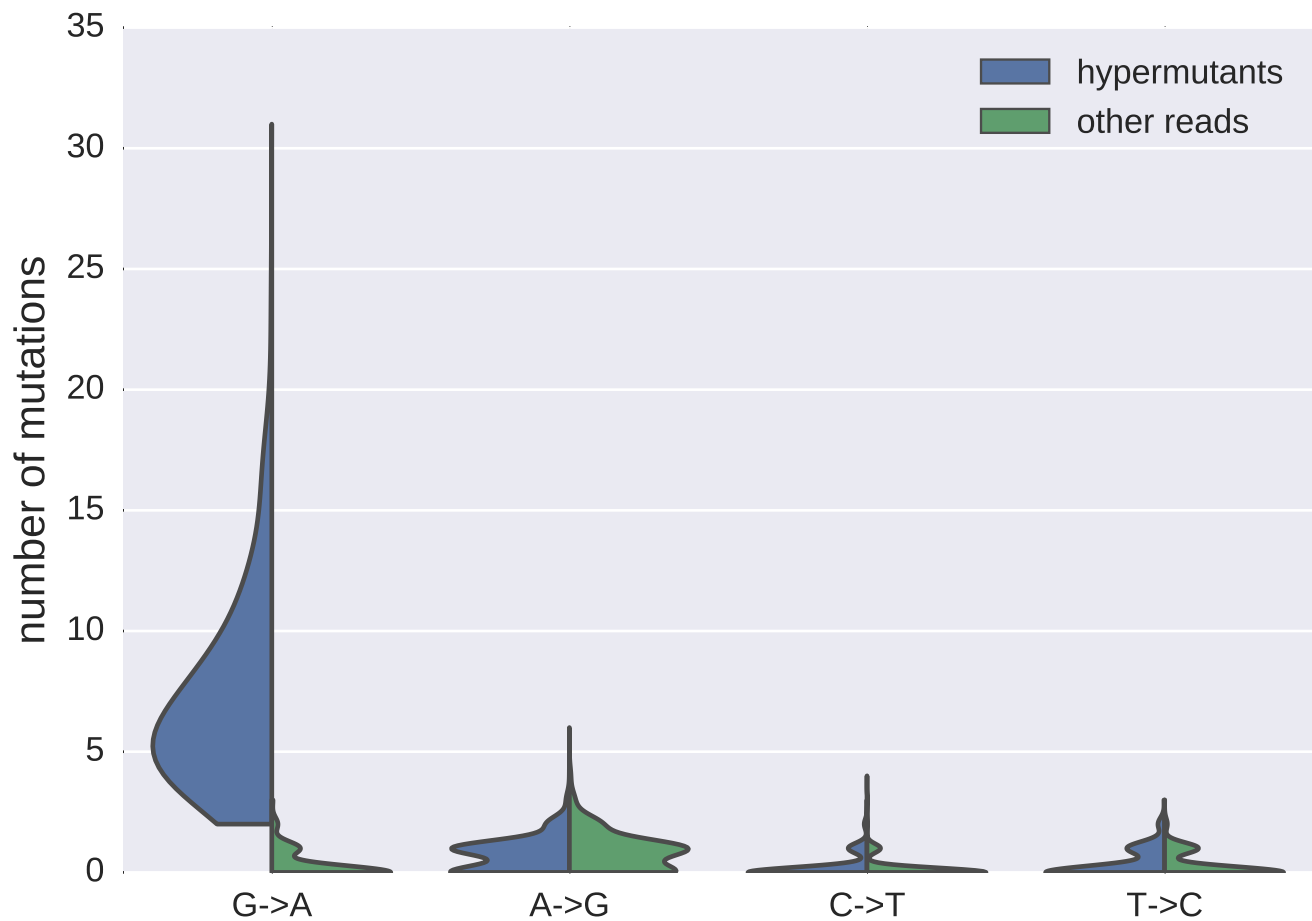

Supplement: supp [file elife-18889-supp-v1.zip]

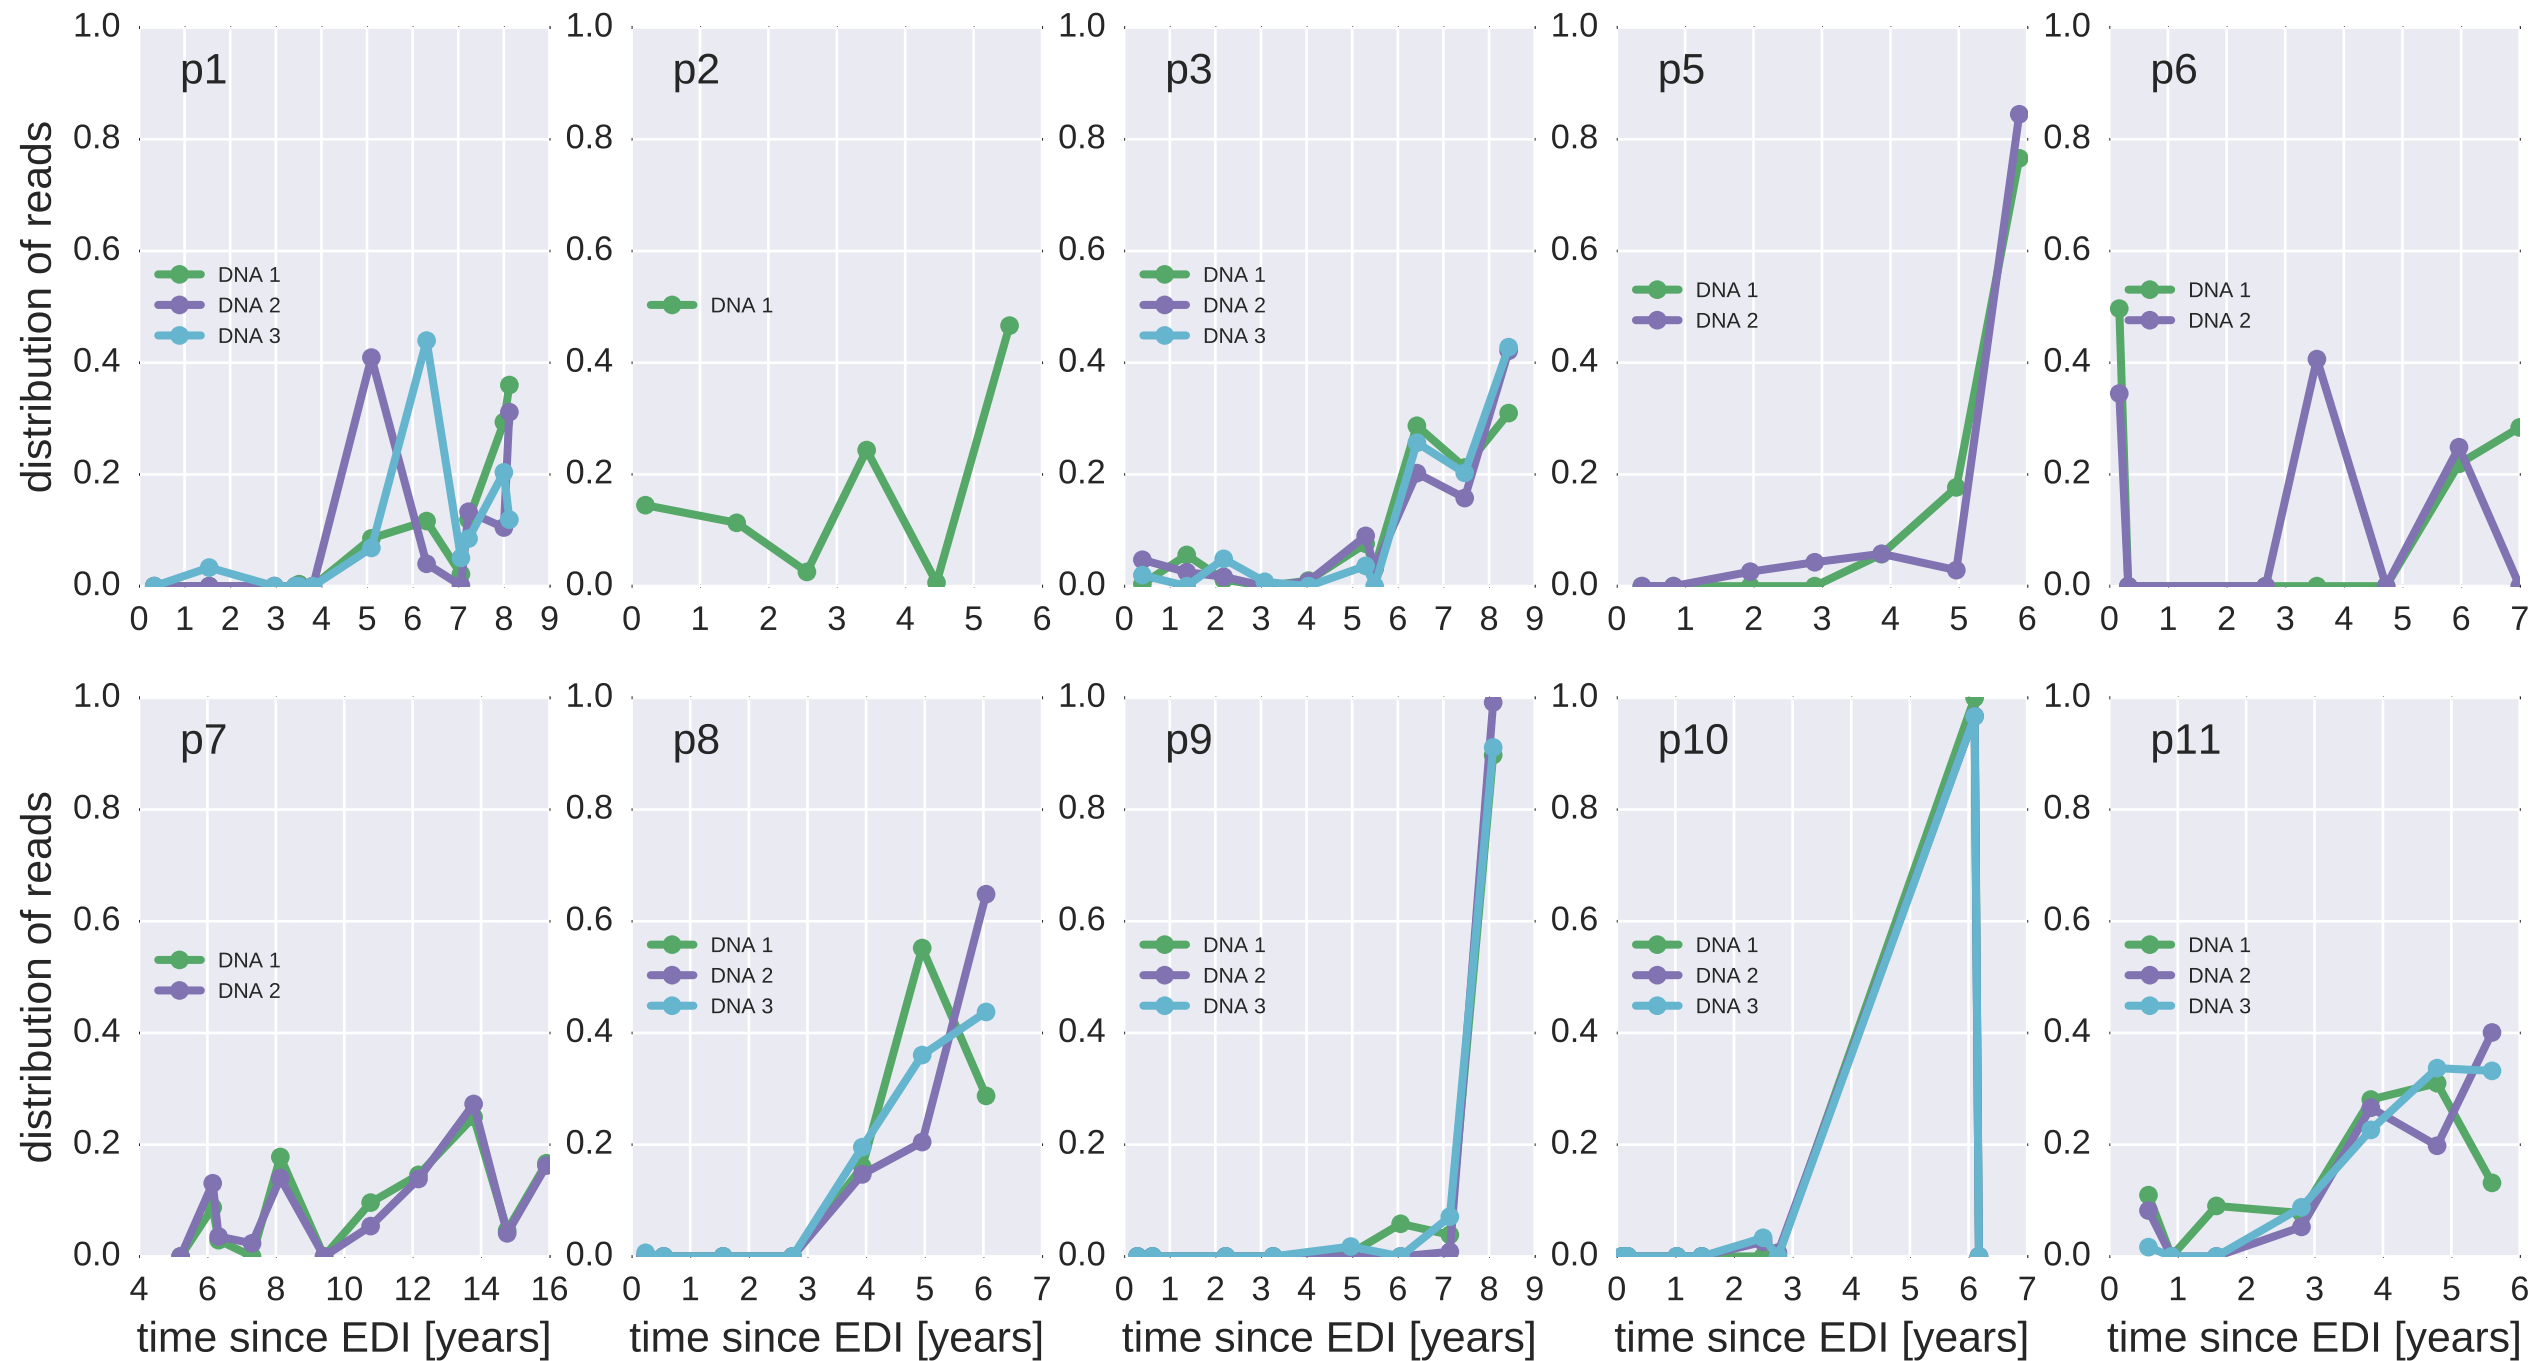

Supplement: supp [file elife-18889-supp-v1.zip]

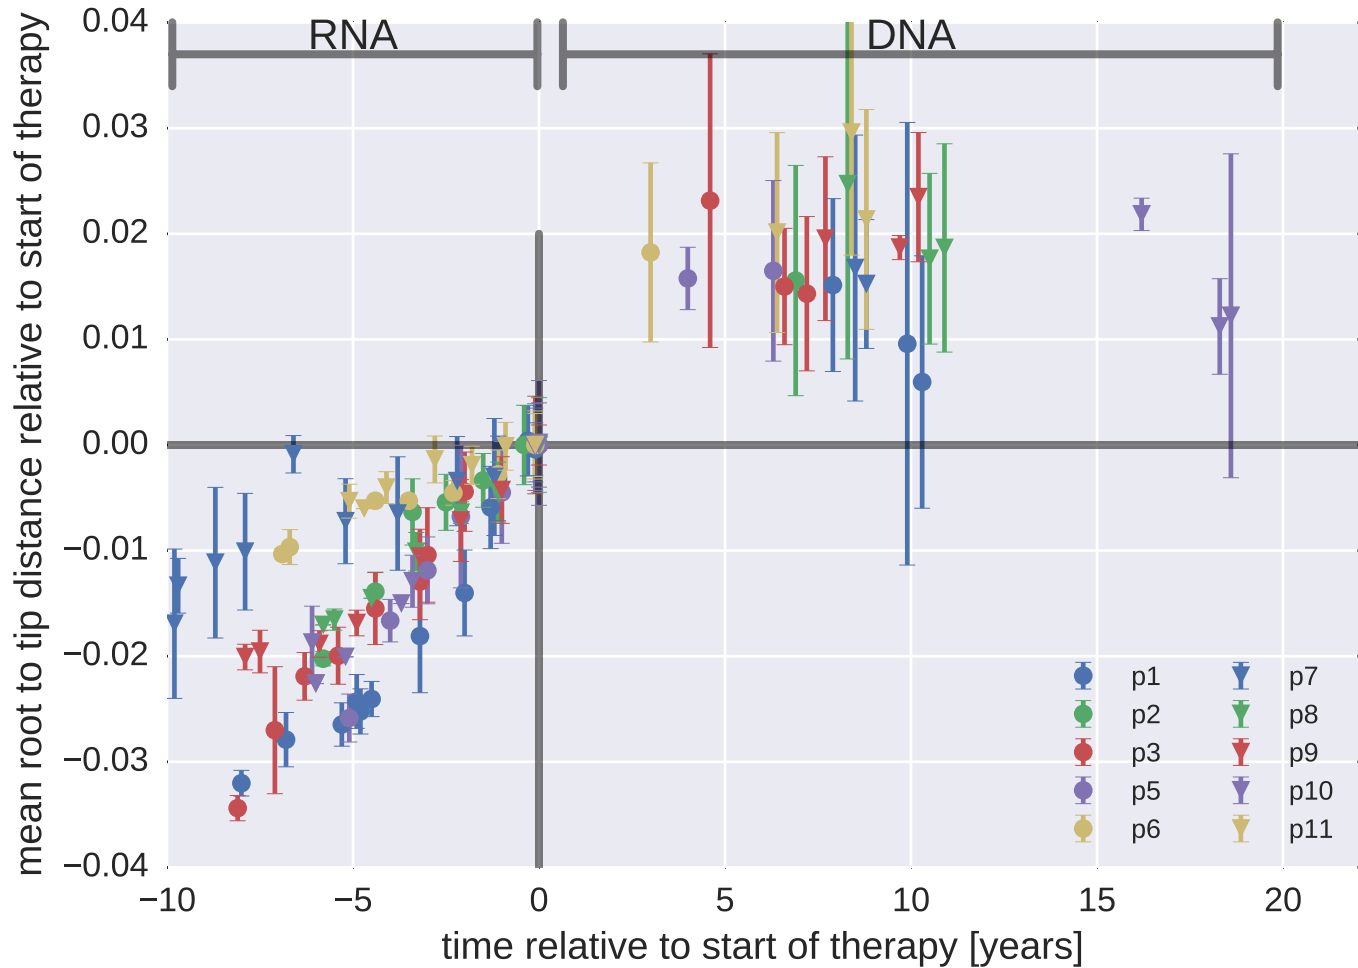

Supplement: supp [file elife-18889-supp-v1.zip]

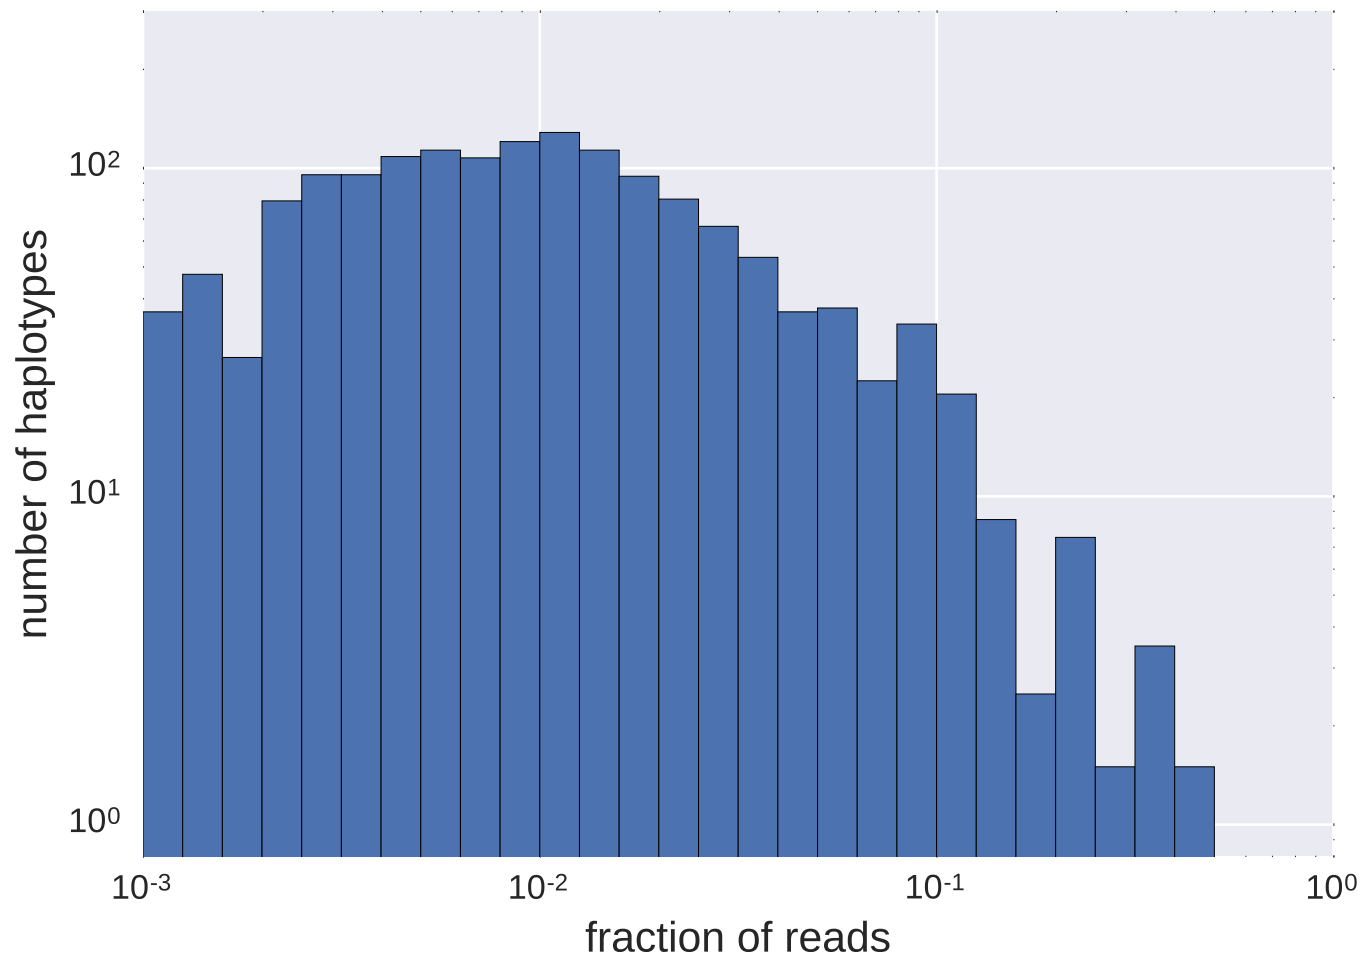

Supplement: supp [file elife-18889-supp-v1.zip]

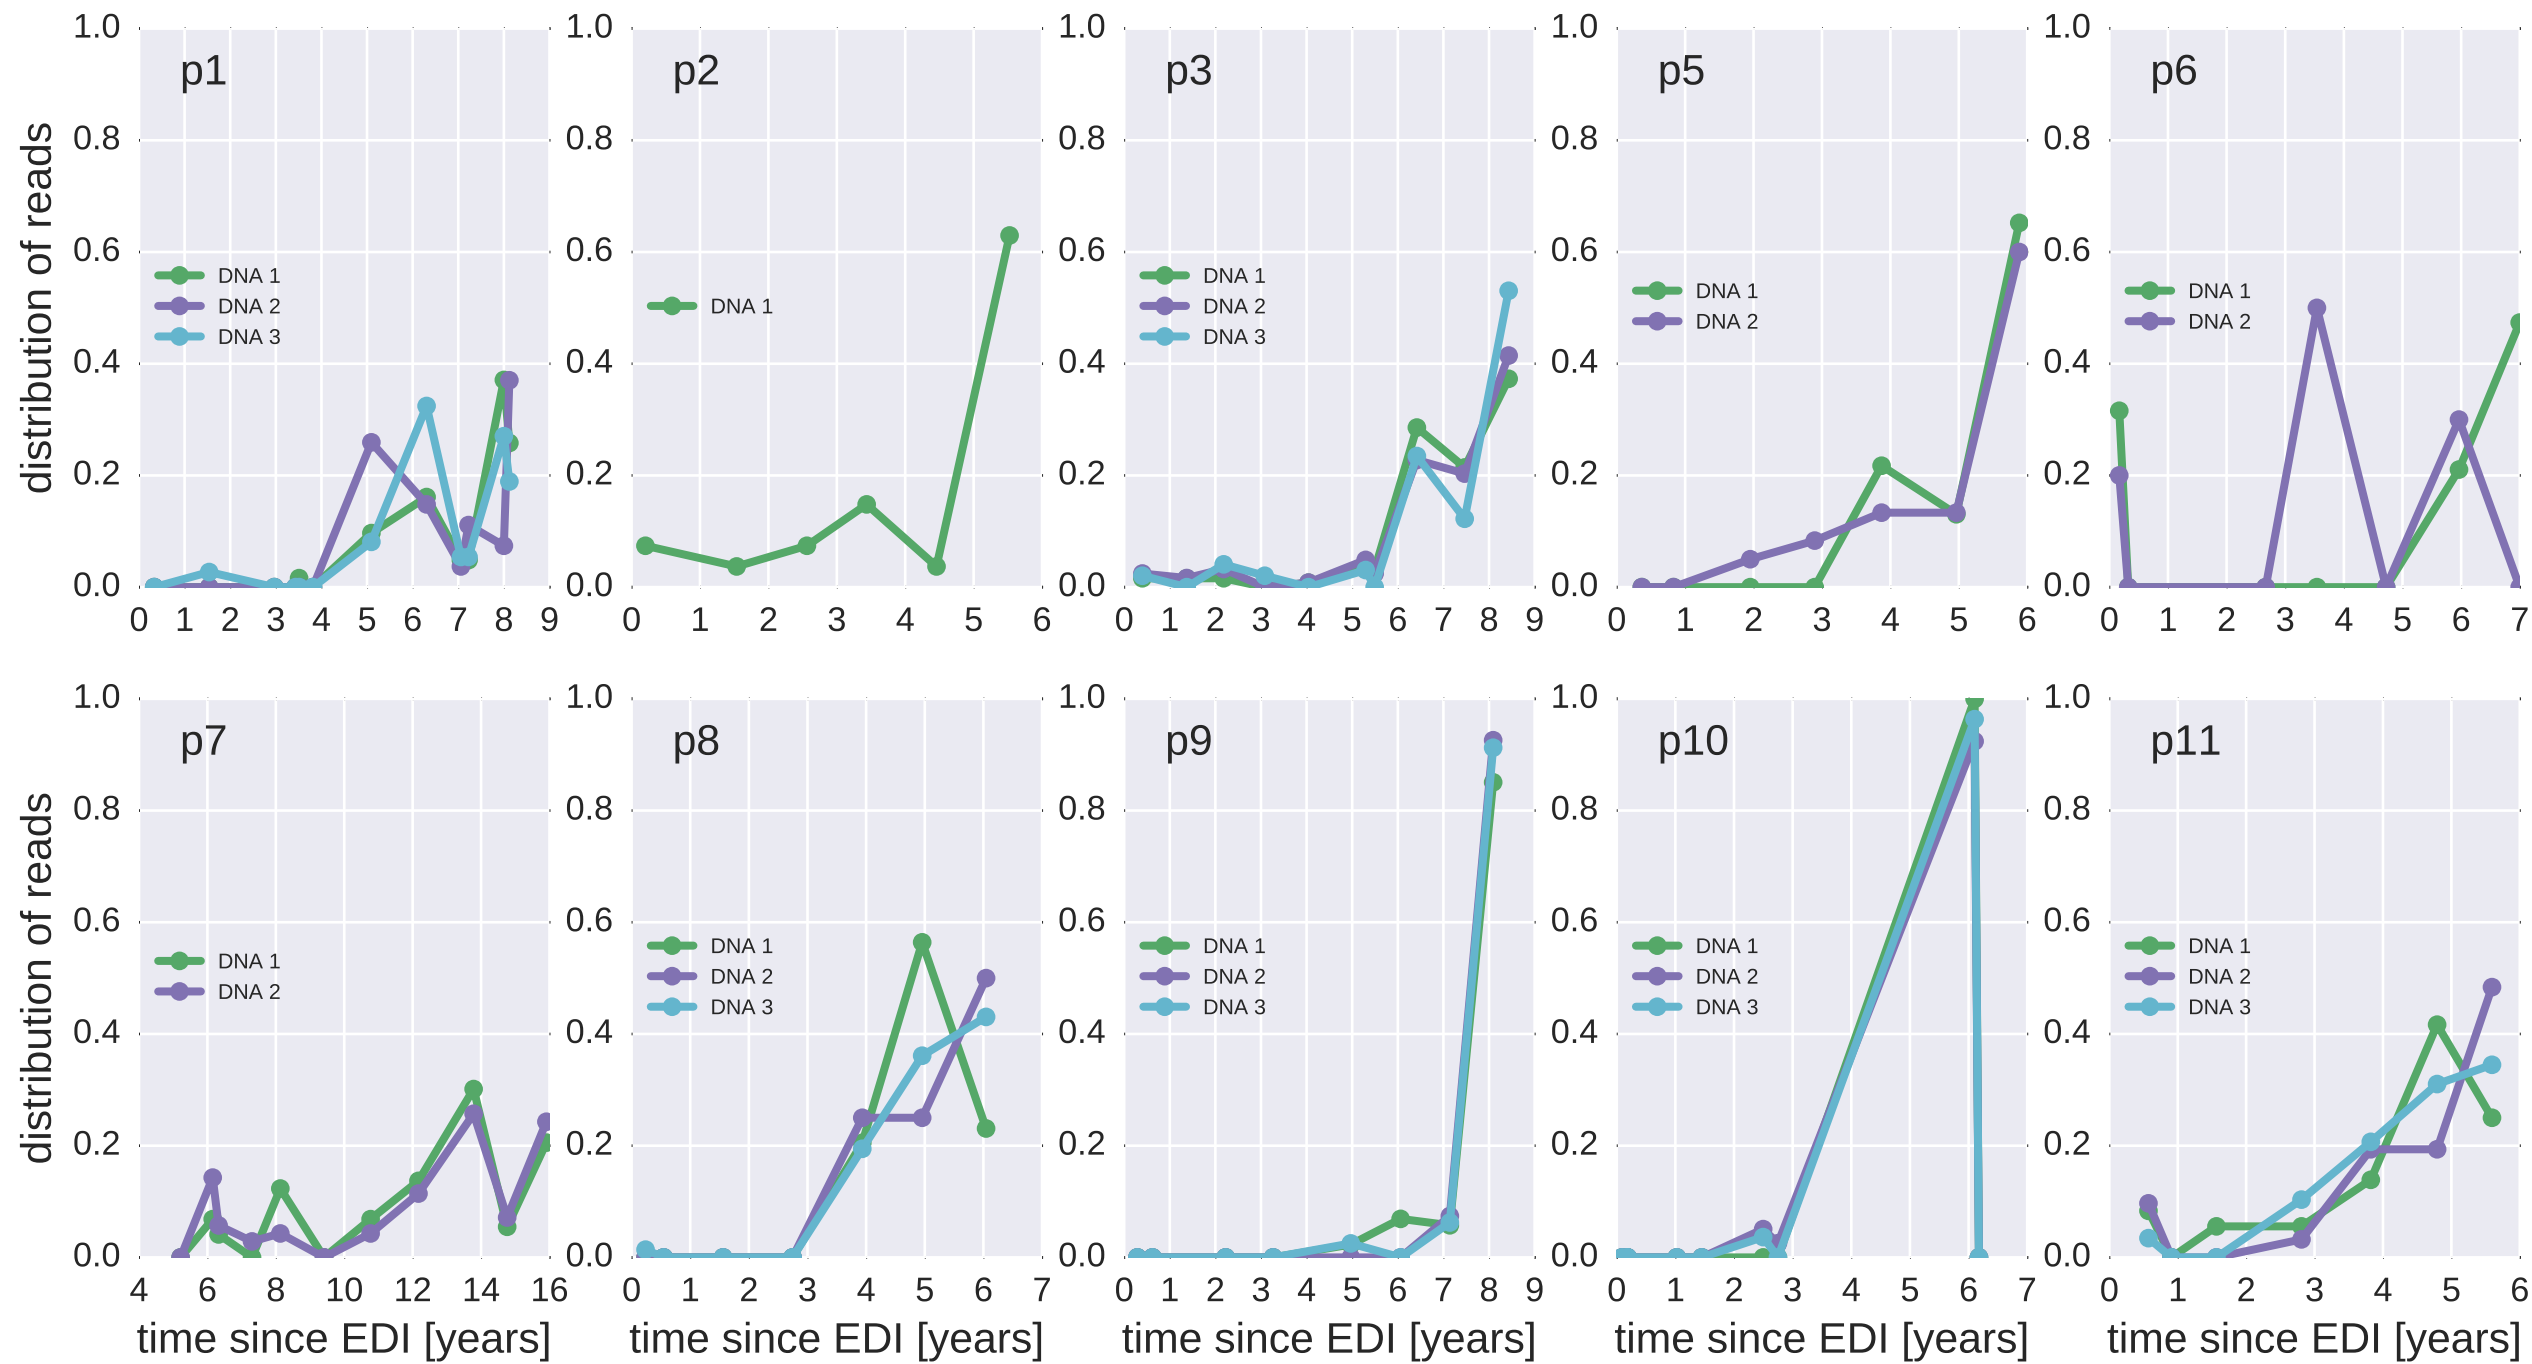

Supplement: supp [file elife-18889-supp-v1.zip]

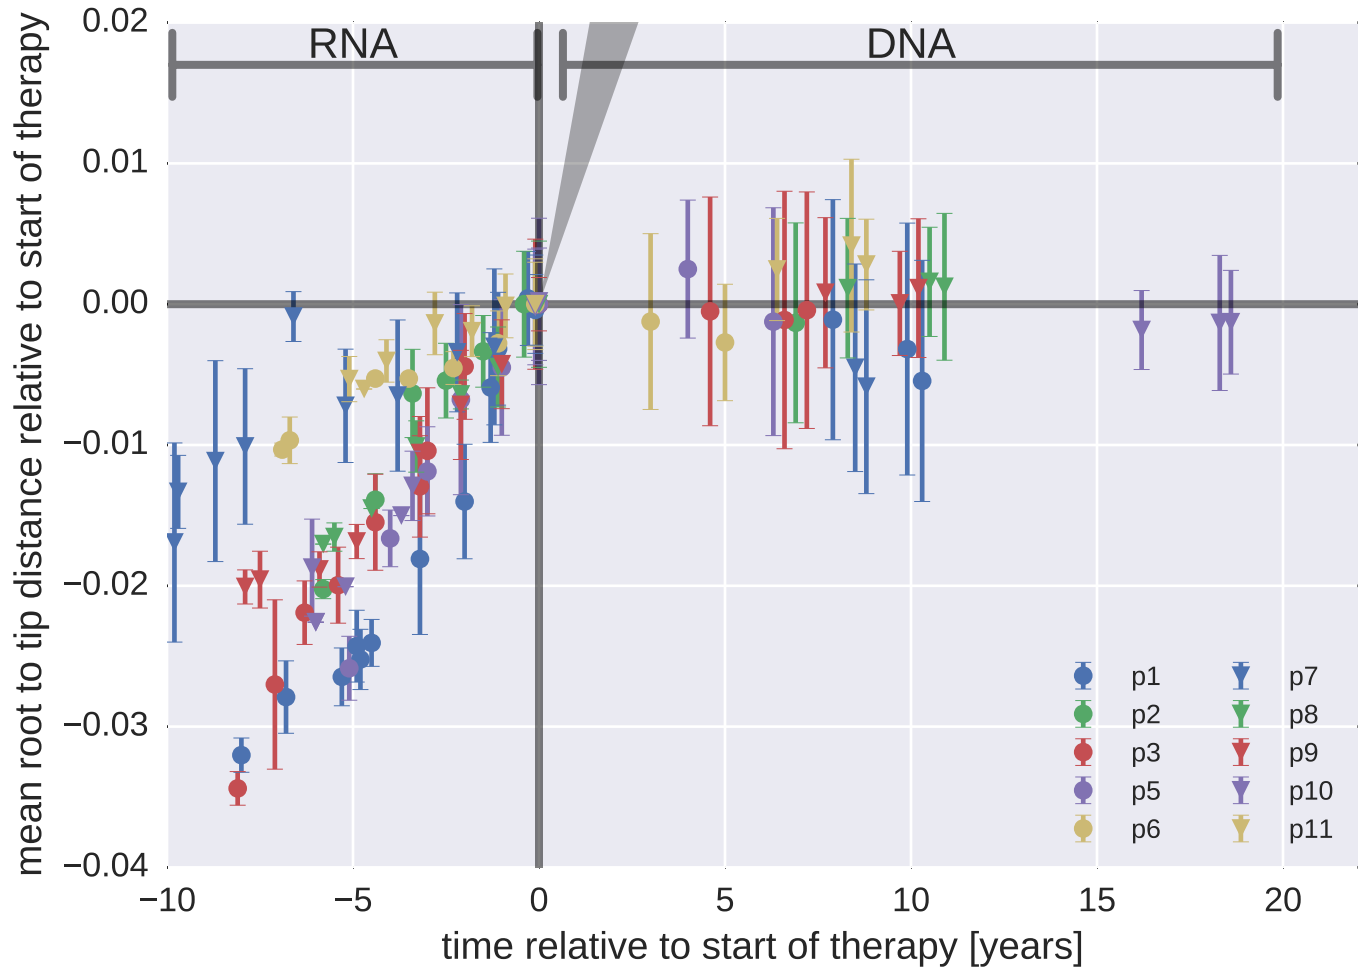

Supplement: supp [file elife-18889-supp-v1.zip]
